# Supplementary material for: Unconventional ionic ring-deconstruction pathways of a three-membered heterocycle
Source: Royal Society of Chemistry journal article supplement (doi:10.1039/c8cc08713j), 2018-01-01
Supplement: c8cc08713j1.pdf [file c8cc08713j1.pdf]

## Electronic Supplementary Information (ESI)

### Unconventional ionic ring-deconstruction pathways of a three-membered heterocycle

Jan Fassbender,<sup>a</sup> Gregor Schnakenburg,<sup>a</sup> Derek P. Gates,<sup>b</sup> Arturo Espinosa Ferao,<sup>\*c</sup> and Rainer Streubel<sup>\*a</sup>

<sup>a</sup> *Institut für Anorganische Chemie der Rheinischen Friedrich-Wilhelms-Universität Bonn, Gerhard-Domagk-Str.1, 53121 Bonn, Germany. Fax: +49 228 739616; Tel: +49 228 735345; E-mail: [r.streubel@uni-bonn.de](mailto:r.streubel@uni-bonn.de).*

<sup>b</sup> *Department of Chemistry, UBC Faculty of Science, Vancouver Campus, 2036 Main Mall, Vancouver, BC, Canada V6T 1Z1*

<sup>c</sup> *Departamento de Química Orgánica, Universidad de Murcia, Campus de Espinardo, 30100 – Murcia, Spain. Fax: +34 868 884149; Tel: +34 868 887489; E-mail: [artuesp@um.es](mailto:artuesp@um.es)*

#### Table of contents

|                                                                                              |     |
|----------------------------------------------------------------------------------------------|-----|
| <b>Experimental data.</b>                                                                    | S2  |
| <b>Additional NMR data on the formation of complex 2.</b>                                    | S6  |
| <b>X-Ray crystallographic analysis</b>                                                       | S7  |
| <b>Computational details.</b>                                                                | S9  |
| <b>Calculated structures:</b> Cartesian coordinates and energies for all<br>computed species | S11 |
| <b>References</b>                                                                            | S14 |

## Experimental data

### Preparative methods

All reactions and manipulations were carried out under an atmosphere of dry argon, using Schlenk and vacuum line techniques. Argon was cleaned over a BTS catalyst; the drying of the Ar gas occurred via silica gel and P<sub>2</sub>O<sub>5</sub>. Solvents were dried according to standard procedures using sodium or sodium/benzophenone and stored in brown glasses over sodium wire, and under inert gas atmosphere.

### Analytical methods

*Melting point measurements* were determined with a Büchi (530) capillary apparatus.

*Elemental analysis* were performed using an Elementar VarioEL analytical gas chromatograph.

*Mass spectrometry*: Electron ionization (70eV) mass spectra were recorded on a MAT 90 or on a MAT 95XL Finnigan spectrometer.

*NMR spectra* were recorded on a Bruker Avance DMX 300 spectrometer (<sup>1</sup>H: 300.1 MHz, <sup>13</sup>C: 75.0 MHz and <sup>31</sup>P: 121.5 MHz,) or a Bruker Avance III HD Ascend 500MHz Prodigy (<sup>1</sup>H: 500.1 MHz, <sup>13</sup>C: 125.8 MHz and <sup>31</sup>P: 202.5 MHz) using CDCl<sub>3</sub> as solvent; shifts are given relative to external tetramethylsilane (<sup>1</sup>H, <sup>13</sup>C,) and 85% H<sub>3</sub>PO<sub>4</sub> (<sup>31</sup>P).

*IR spectra* were recorded with a SMART iTR Nicolet 380 FT IR spectrometer; only selected peaks are given.

*Procedure for the spectroscopic characterization of complex 2*. Oxaphosphirane tungsten complex **1** (34.3 mg, 0.07 mmol) and potassium *tert*-butoxide (7.8 mg, 0.07 mmol) were dissolved in THF-*d*<sub>8</sub> (0.6 ml) in a YOUNG NMR tube at room temperature, thus yielding a deep red reaction solution which was subsequently measured. An isolation of **2** was not possible due to decomposition of **2** upon removal of all volatiles *in vacuo* (2•10<sup>-2</sup> mbar).

<sup>1</sup>H NMR (THF-*d*<sub>8</sub>): δ = 1.13 (d, |<sup>3</sup>J<sub>P,H</sub>| = 10.8 Hz, 9H, PC(CH<sub>3</sub>)<sub>3</sub>); 1.18 (s, 9H, POC(CH<sub>3</sub>)<sub>3</sub>); <sup>13</sup>C{<sup>1</sup>H} NMR (THF-*d*<sub>8</sub>): δ = 30.0 (d, |<sup>3</sup>J<sub>P,C</sub>| = 19.6 Hz, POC(CH<sub>3</sub>)<sub>3</sub>); 30.1

(d,  $^2J_{P,C}$  = 10.1 Hz, PC(CH<sub>3</sub>)<sub>3</sub>); 35.2 (d,  $^1J_{P,C}$  = 36.0 Hz, PC(CH<sub>3</sub>)<sub>3</sub>); 71.9 (d,  $^2J_{P,C}$  = 10.4 Hz, POC(CH<sub>3</sub>)<sub>3</sub>); 208.6 (d,  $^2J_{P,C}$  = 4.9 Hz, *cis*-CO); 212.2 (d,  $^2J_{P,C}$  = 12.0 Hz, *trans*-CO); **<sup>31</sup>P{<sup>1</sup>H} NMR** (THF-*d*<sub>8</sub>):  $\delta$  = 198.8 (*s*<sub>Sat</sub>,  $^1J_{W,P}$  = 76.8 Hz).

*General procedure for the synthesis of complexes 5, 6.* To a solution of oxaphosphirane tungsten complex **1** in THF, solid potassium butoxide (1 equivalent) was added at room temperature and the solution is stirred for two hours. Afterwards, an excess of trapping reagent (0.5 M solution of HCl in diethyl ether or iodomethane, respectively) was added and the resulting solution is stirred for further 30 minutes. Subsequent removal of all volatiles *in vacuo* ( $2 \cdot 10^{-2}$  mbar) followed by extraction of the residue with *n*-pentane and removal of all volatiles from the combined extracts *in vacuo* ( $2 \cdot 10^{-2}$  mbar) yielded **5** and **6** as a brown or yellow oils, respectively.

**5: Yield** 87 %; **<sup>1</sup>H NMR** (CDCl<sub>3</sub>):  $\delta$  = 1.20 (9H, d,  $^3J_{P,H}$  = 16.6 Hz, PC(CH<sub>3</sub>)<sub>3</sub>), 1.43 (9H, s, POC(CH<sub>3</sub>)<sub>3</sub>), 7.65 (1H, d,  $^1J_{P,H}$  = 308.8 Hz, PH); **<sup>13</sup>C{<sup>1</sup>H} NMR** (CDCl<sub>3</sub>):  $\delta$  = 26.3 (d,  $^2J_{P,C}$  = 6.3 Hz, PC(CH<sub>3</sub>)<sub>3</sub>), 29.6 (d,  $^3J_{P,C}$  = 4.0 Hz, POC(CH<sub>3</sub>)<sub>3</sub>), 36.3 (d,  $^1J_{P,C}$  = 28.2 Hz, PCC(CH<sub>3</sub>)<sub>3</sub>), 80.1 (d,  $^2J_{P,C}$  = 13.2 Hz, POC(CH<sub>3</sub>)<sub>3</sub>), 197.4 (d<sub>sat</sub>,  $^1J_{W,C}$  = 125.6 Hz,  $^2J_{P,C}$  = 7.8 Hz, *cis*-CO), 199.1 (d,  $^2J_{P,C}$  = 25.3 Hz, *trans*-CO); **<sup>31</sup>P{<sup>1</sup>H} NMR** (CDCl<sub>3</sub>):  $\delta$  = 104.3 (*s*<sub>Sat</sub>,  $^1J_{W,P}$  = 268.7 Hz); **ms** (EI, <sup>184</sup>W): *m/z* (%): 486.0 (25, [M]<sup>+</sup>), 429.9 (18, [M-C<sub>4</sub>H<sub>8</sub>]<sup>+</sup>), 401.9 (56, [M-C<sub>4</sub>H<sub>8</sub>-CO]<sup>+</sup>), 373.9 (29, [M-C<sub>4</sub>H<sub>8</sub>-2CO]<sup>+</sup>), 346.0 (82, [M-5CO]<sup>+</sup>), 343.9 (86, [M-2 tBu-CO]<sup>+</sup>), 57.1 (100, [tBu]<sup>+</sup>); **IR** (ATR):  $\tilde{\nu}$  = 1906 (vs,  $\nu$ (CO)), 1980 (m,  $\nu$ (CO)), 2071 (s,  $\nu$ (CO))cm<sup>-1</sup>.

**6: Yield** 57 %; **<sup>1</sup>H NMR** (CDCl<sub>3</sub>):  $\delta$  = 0.90 (9H, d,  $^3J_{P,H}$  = 15.2 Hz, PC(CH<sub>3</sub>)<sub>3</sub>), 1.10 (9H, d,  $^4J_{P,H}$  = 0.5 Hz, POC(CH<sub>3</sub>)<sub>3</sub>), 1.45 (3H, d,  $^2J_{P,H}$  = 4.2 Hz, PCH<sub>3</sub>); **<sup>13</sup>C{<sup>1</sup>H} NMR** (CDCl<sub>3</sub>):  $\delta$  = 22.0 (d,  $^1J_{P,C}$  = 11.3 Hz, PCH<sub>3</sub>), 24.4 (d,  $^2J_{P,C}$  = 6.5 Hz, PC(CH<sub>3</sub>)<sub>3</sub>), 30.9 (d,  $^3J_{P,C}$  = 3.2 Hz, POC(CH<sub>3</sub>)<sub>3</sub>), 37.3 (d,  $^1J_{P,C}$  = 31.4 Hz, PCC(CH<sub>3</sub>)<sub>3</sub>), 80.1 (d,  $^2J_{P,C}$  = 12.6 Hz, POC(CH<sub>3</sub>)<sub>3</sub>), 198.9 (d,  $^2J_{P,C}$  = 7.8 Hz, *cis*-CO), 199.6 (d,  $^2J_{P,C}$  = 24.2 Hz, *trans*-CO); **<sup>31</sup>P{<sup>1</sup>H} NMR** (CDCl<sub>3</sub>):  $\delta$  = 128.6 (*s*<sub>Sat</sub>,  $^1J_{W,P}$  = 270.8 Hz); **ms** (EI, <sup>184</sup>W): *m/z* (%): 500.0 (24, [M]<sup>+</sup>), 443.9 (16, [M-C<sub>4</sub>H<sub>8</sub>]<sup>+</sup>), 416.0 (40, [M-3CO]<sup>+</sup>), 388.0 (29, [M-4CO]<sup>+</sup>), 386.0 (30, [M-2 tBu]<sup>+</sup>), 360.0 (88, [M-5CO]<sup>+</sup>), 358.0 (96, [M-2 tBu-CO]<sup>+</sup>), 57.1 (100, [tBu]<sup>+</sup>); **IR** (ATR):  $\tilde{\nu}$  = 1901 (vs,  $\nu$ (CO)), 1975 (m,

$\nu(\text{CO})$ ), 2068 (s,  $\nu(\text{CO})$ ) $\text{cm}^{-1}$ ; **elemental analysis** for  $\text{C}_{14}\text{H}_{21}\text{O}_6\text{PW}$  Calc (%): C 33.62, H 4.23, found (%): C 33.35, H 4.42.

*Procedure for the synthesis of complex 7.* To a solution of oxaphosphirane tungsten complex **1** (191 mg, 0.38 mmol) in dichloromethane (5 ml), acetonitrile (0.022 ml, 0.42 mmol) was added and the resulting solution cooled to  $-30\text{ }^\circ\text{C}$ . At this temperature, triflic acid (0.033 ml, 0.38 mmol) was added and the solution stirred for one hour. Afterwards, trimethylamine (0.1 ml, excess) was added and the solution allowed to warm up to room temperature over a period of 45 minutes. Afterwards, all volatiles were removed *in vacuo* ( $2 \cdot 10^{-2}$  mbar) and the residue was extracted with *n*-pentane (5  $\cdot$  3 ml). Removal of all volatiles from the combined extraction solutions *in vacuo* ( $2 \cdot 10^{-2}$  mbar) yielded **2** as a colourless powder. Single crystals of **7** were obtained from a concentrated solution of **2** in *n*-pentane by slow evaporation of the solvent at room temperature.

**7: Yield** 196 mg (95 %); **m.p.** 83-86  $^\circ\text{C}$ ;  **$^1\text{H}$  NMR** ( $\text{CDCl}_3$ ):  $\delta = 1.07$  (d,  $|^3J_{\text{P,H}}| = 14.8$  Hz, 9H,  $\text{PC}(\text{CH}_3)_3$ ); 1.14 (s, 9H,  $\text{PCC}(\text{CH}_3)_3$ ); 2.07 (s, 3H,  $\text{PNCHCH}_3$ ); 4.53 (d,  $|^2J_{\text{P,H}}| = 9.7$  Hz, PCH);  **$^{13}\text{C}\{^1\text{H}\}$  NMR** ( $\text{CDCl}_3$ ):  $\delta = 17.2$  (d,  $|^2J_{\text{P,C}}| = 8.6$  Hz,  $\text{PNCNCH}_3$ ); 26.7 (d,  $|^2J_{\text{P,C}}| = 6.3$  Hz,  $\text{PC}(\text{CH}_3)_3$ ); 29.4 (d,  $|^3J_{\text{P,C}}| = 2.9$  Hz,  $\text{PCC}(\text{CH}_3)_3$ ); 34.4 (d,  $|^2J_{\text{P,C}}| = 4.6$  Hz,  $\text{PCC}(\text{CH}_3)_3$ ); 38.4 (d,  $|^1J_{\text{P,C}}| = 6.3$  Hz,  $\text{PC}(\text{CH}_3)_3$ ); 102.0 (d,  $|^1J_{\text{P,C}}| = 11.5$  Hz,  $\text{PCC}(\text{CH}_3)_3$ ); 169.2 (d,  $|^2J_{\text{P,C}}| = 13.8$  Hz,  $\text{PNC}(\text{CH}_3)_3$ ); 197.2 (d,  $|^2J_{\text{P,C}}| = 7.5$  Hz, *cis*-CO); 198.7 (d,  $|^2J_{\text{P,C}}| = 25.5$  Hz, *trans*-CO);  **$^{31}\text{P}\{^1\text{H}\}$  NMR** ( $\text{CDCl}_3$ ):  $\delta = 115.6$  ( $s_{\text{sat}}$ ,  $|^1J_{\text{W,P}}| = 263.0$  Hz); **ms** (EI,  $^{184}\text{W}$ )  $m/z$  (%): 539.1 (100,  $[\text{M}]^+$ ); 511.1 (18,  $[\text{M}-\text{CO}]^+$ ); 483.0 (52,  $[\text{M}-2\text{CO}]^+$ ); 482.0 (45,  $[\text{M}-\text{C}_4\text{H}_9]^+$ ); 454.0 (24,  $[\text{M}-\text{C}_4\text{H}_9-\text{CO}]^+$ ); 427.0 (42,  $[\text{M}-4\text{CO}]^+$ ); 398.0 (24,  $[\text{M}-\text{C}_4\text{H}_9-3\text{CO}]^+$ ); 57.1 (83,  $[\text{C}_4\text{H}_9]^+$ ); **IR** (ATR):  $\tilde{\nu} = 1911$  (vs,  $\nu(\text{CO})$ ), 1948 (m,  $\nu(\text{CO})$ ), 2071 (s,  $\nu(\text{CO})$ )  $\text{cm}^{-1}$ ; **elemental analysis** for  $\text{C}_{16}\text{H}_{22}\text{NO}_6\text{PW}$  Calc (%): C 35.64, H 4.11, N 2.60, found (%): C 35.60, H 4.09, N 2.54.

*Procedure for the spectroscopic characterization of complex 8.* To a solution of oxaphosphirane tungsten complex **1** (56 mg, 0.11 mmol) in dichloromethane- $d_2$  (0.75 ml), triflic acid (0.011 ml, 0.12 mmol) was added at room temperature and the solution stirred for five minutes. Afterwards, the deep red reaction solution was filtered from the formed red residue into an NMR tube and subsequently measured. An isolation was not possible due to decomposition of **3** upon removal of all volatiles *in vacuo* ( $2 \cdot 10^{-2}$  mbar).

**<sup>1</sup>H NMR** (CD<sub>2</sub>Cl<sub>2</sub>): δ = 1.30 (d, <sup>3</sup>J<sub>P,H</sub> = 18.1 Hz, 9H, PC(CH<sub>3</sub>)<sub>3</sub>), the proton of the OH-functionality could not be identified. Furthermore, a very broad multiplet (0.6 – 1.0 ppm) was observed, which could be caused by a polymer formed from the liberated 2-methyl-2-butene upon cationic polymerization; **<sup>13</sup>C{<sup>1</sup>H} NMR** (CD<sub>2</sub>Cl<sub>2</sub>): δ = 23.0 (d, <sup>2</sup>J<sub>P,C</sub> = 7.7 Hz, PC(CH<sub>3</sub>)<sub>3</sub>); 43.0 (d, <sup>1</sup>J<sub>P,C</sub> = 27.6 Hz, PC(CH<sub>3</sub>)<sub>3</sub>); 194.4 (d, <sup>2</sup>J<sub>P,C</sub> = 7.7 Hz, *cis*-CO); 195.9 (d, <sup>2</sup>J<sub>P,C</sub> = 39.1 Hz, *trans*-CO). The carbon atom of the triflate substituent could not be unequivocally identified, yet very broad signals were observed at 110 to 120 ppm, which most probably are a quartet due to coupling to the fluorine atoms; **<sup>31</sup>P{<sup>1</sup>H} NMR** (CD<sub>2</sub>Cl<sub>2</sub>): δ = 214.0 (br. s<sub>sat</sub>, <sup>1</sup>J<sub>W,P</sub> = 332.7 Hz).

*Procedure for the synthesis of complex 9.* To a solution of oxaphosphirane tungsten complex **1** (165 mg, 0.33 mmol) in dichloromethane (5 ml), triflic acid (0.032 ml, 0.36 mmol) was added at room temperature and the solution stirred for five minutes. Afterwards, one drop of methanol (excess) was added and the resulting solution stirred for further 30 minutes. Subsequent removal of all volatiles *in vacuo* (2•10<sup>-2</sup> mbar) followed by extraction of the residue with *n*-pentane (3•5 ml) and removal of all volatiles from the combined extracts *in vacuo* (2•10<sup>-2</sup> mbar) yielded **9** as a yellow oil.

**9**: Yield 111 mg (73 %); **<sup>1</sup>H NMR** (CDCl<sub>3</sub>): δ = 1.15 (9H, d, <sup>3</sup>J<sub>P,H</sub> = 16.1 Hz, PC(CH<sub>3</sub>)<sub>3</sub>), 3.70 (3H, d, <sup>3</sup>J<sub>P,H</sub> = 12.1 Hz, POCH<sub>3</sub>), 3.84 (1H, d, <sup>2</sup>J<sub>P,H</sub> = 11.6 Hz, POH); **<sup>13</sup>C{<sup>1</sup>H} NMR** (CDCl<sub>3</sub>): δ = 23.6 (d, <sup>2</sup>J<sub>P,C</sub> = 7.1 Hz, PC(CH<sub>3</sub>)<sub>3</sub>), 39.5 (d, <sup>1</sup>J<sub>P,C</sub> = 37.8 Hz, PC(CH<sub>3</sub>)<sub>3</sub>), 54.2 (d, <sup>2</sup>J<sub>P,C</sub> = 3.9 Hz, POCH<sub>3</sub>), 196.5 (d, <sup>2</sup>J<sub>P,C</sub> = 8.4 Hz, *cis*-CO), 198.2 (d, <sup>2</sup>J<sub>P,C</sub> = 28.8 Hz, *trans*-CO); **<sup>31</sup>P{<sup>1</sup>H} NMR** (CDCl<sub>3</sub>): δ = 171.7 (s<sub>sat</sub>, <sup>1</sup>J<sub>W,P</sub> = 298.5 Hz); **ms** (EI, 184W) : m/z (%): 460(30, [M]<sup>+</sup>); 432 (18, [M-CO]<sup>+</sup>); 404 (28, [M-2 CO]<sup>+</sup>); 376 (90, [M-3 CO]<sup>+</sup>); 346 (6, [M-4 CO]<sup>+</sup>); 318 (5, [M-5 CO]<sup>+</sup>); 57 (100, [C<sub>4</sub>H<sub>9</sub>]<sup>+</sup>); **IR** (ATR):  $\tilde{\nu}$  = 1896 (vs, ν(CO)), 1982 (m, ν(CO)), 2071 (s, ν(CO)); 3543 (br s, ν(OH)) cm<sup>-1</sup>.

## Additional NMR spectra of the formation of complex 2

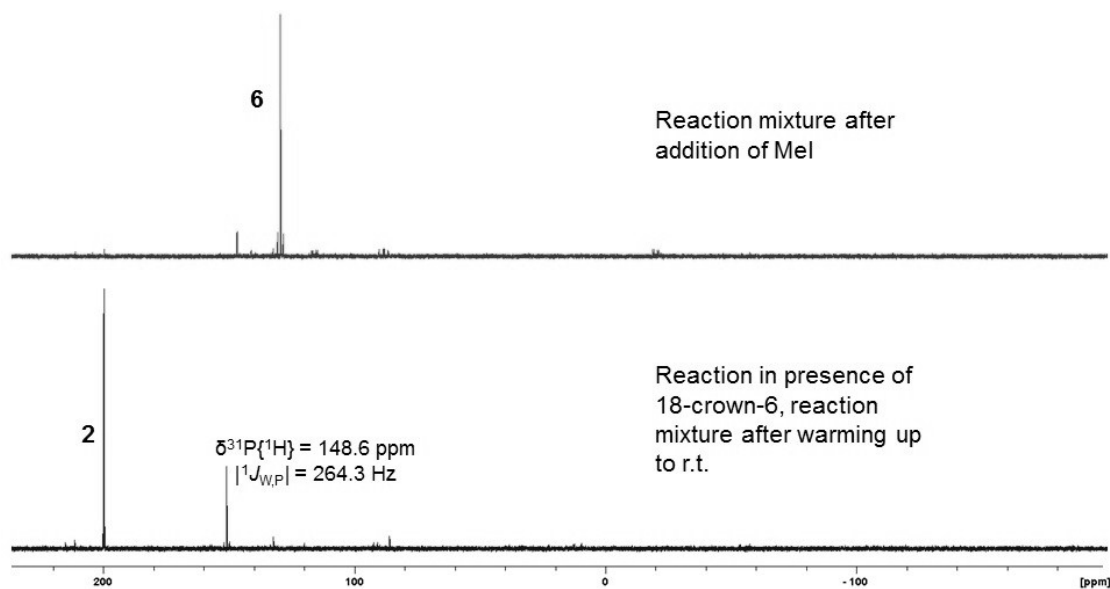

**Figure S 1:** NMR spectra of the reaction of **1** with KO<sup>t</sup>Bu in presence of 18-crown-6 at -30 °C; spectra obtained after warming up to ambient temperature (bottom) and after addition of MeI to the reaction mixture at ambient temperature (top).

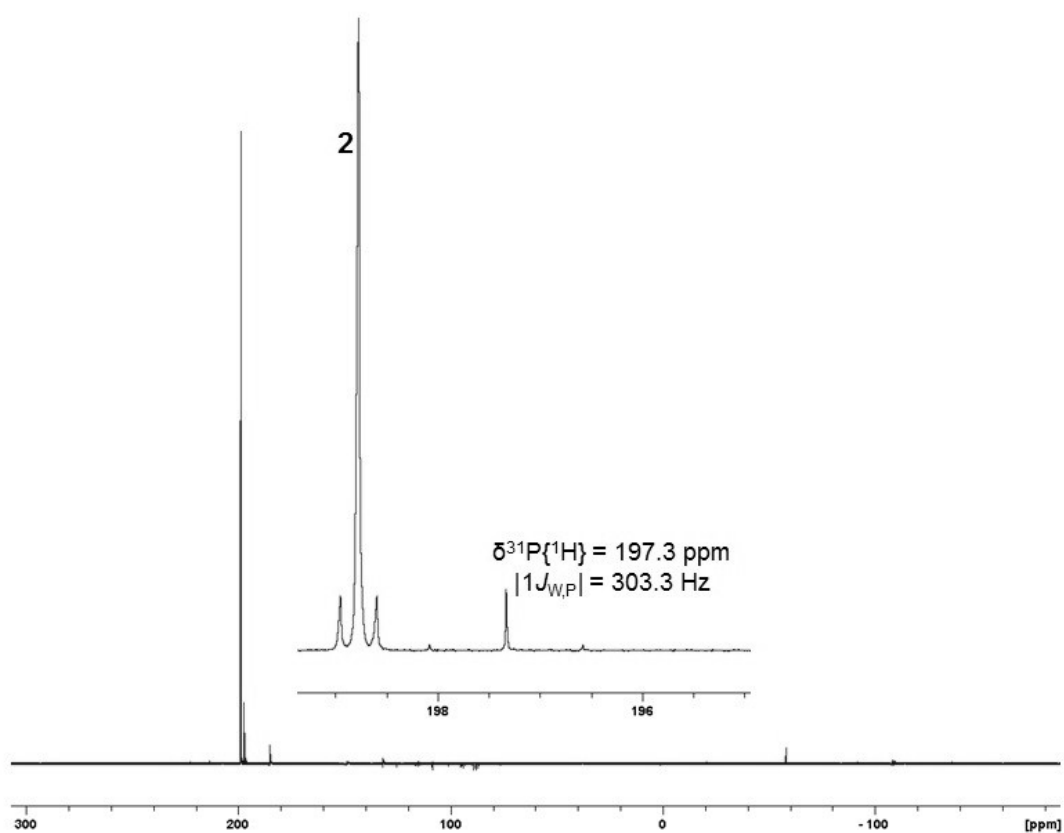

**Figure S 2:** NMR spectrum of the reaction of **1** with KO<sup>t</sup>Bu at ambient temperature (in absence of 18-crown-6) and expansion of the main products.

## X-Ray crystallographic analysis

Single crystals of **7** were obtained from recrystallizations in *n*-pentane at 8 °C. Crystal structures were recorded on a Bruker X8-KappaApexII diffractometer. The structures were solved by the method of intrinsic phasing as implemented in SHELXT<sup>1</sup> and refined by full-matrix least squares on F<sup>2</sup> (SHELXL-2014<sup>2</sup>). All non-hydrogen atoms were refined anisotropically. Hydrogen atoms were included isotropically using the riding model on the bound atoms. Absorption corrections were carried out semi-empirically from equivalents. Additionally, some calculation of bond lengths and angles were obtained using the Ortep32 program. Crystallographic data for the structure reported in this paper has been deposited in the Cambridge Crystallographic Data Centre as supplementary publication no. CCDC-1865572. Copies of these data can be obtained free of charge from the Cambridge Crystallographic Data Centre via [www.ccdc.cam.ac.uk/data\\_request/cif](http://www.ccdc.cam.ac.uk/data_request/cif).

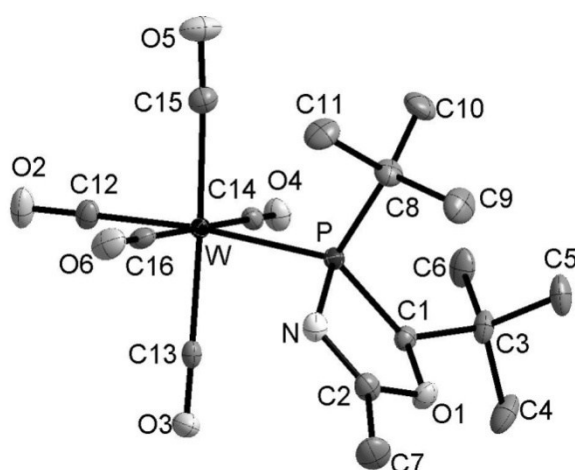

|                   |                                                      |
|-------------------|------------------------------------------------------|
| Crystal Habitus   | clear colourless plate                               |
| Empirical formula | C <sub>16</sub> H <sub>22</sub> NO <sub>6</sub> PW   |
| Moiety formula    | C <sub>16</sub> H <sub>22</sub> N O <sub>6</sub> P W |
| Formula weight    | 539.16                                               |
| Temperature/K     | 100                                                  |
| Crystal system    | Monoclinic                                           |
| Space group       | P2 <sub>1</sub> /c                                   |
| a/Å               | 9.6668(4)                                            |
| b/Å               | 16.0328(6)                                           |
| c/Å               | 12.9821(5)                                           |
| α/°               | 90                                                   |
| β/°               | 96.2700(10)                                          |

|                                                |                                                                   |
|------------------------------------------------|-------------------------------------------------------------------|
| $\gamma/^\circ$                                | 90                                                                |
| Volume/ $\text{\AA}^3$                         | 2000.01(14)                                                       |
| Z                                              | 4                                                                 |
| $\rho_{\text{calc}}/\text{g}/\text{cm}^3$      | 1.791                                                             |
| $\mu/\text{mm}^{-1}$                           | 5.884                                                             |
| F(000)                                         | 1048.0                                                            |
| Crystal size/ $\text{mm}^3$                    | 0.2 • 0.11 • 0.06                                                 |
| Absorption correction                          | Empirical                                                         |
| Tmin; Tmax                                     | 0.4464; 0.7461                                                    |
| Radiation                                      | MoK $\alpha$ ( $\lambda = 0.71073$ )                              |
| 2 $\Theta$ range for data collection/ $^\circ$ | 5.982 to 55.992 $^\circ$                                          |
| Completeness to theta                          | 0.997                                                             |
| Index ranges                                   | $-8 \leq h \leq 12$ , $-21 \leq k \leq 21$ , $-17 \leq l \leq 17$ |
| Reflections collected                          | 37519                                                             |
| Independent reflections                        | 4823 [ $R_{\text{int}} = 0.0305$ , $R_{\text{sigma}} = 0.0173$ ]  |
| Data/restraints/parameters                     | 4823/2/233                                                        |
| Goodness-of-fit on $F^2$                       | 1.054                                                             |
| Final R indexes [ $I \geq 2\sigma(I)$ ]        | $R_1 = 0.0125$ , $wR_2 = 0.0302$                                  |
| Final R indexes [all data]                     | $R_1 = 0.0138$ , $wR_2 = 0.0307$                                  |
| Largest diff. peak/hole / $e \text{\AA}^{-3}$  | 0.71/-0.59                                                        |



## Computational details

DFT calculations were performed with the ORCA program.<sup>3</sup> All geometry optimizations were run in redundant internal coordinates with tight convergence criteria using the B3LYP functional<sup>4</sup> together with the def2-TZVP basis set.<sup>5</sup> For W atoms the [SD(60,MWB)] effective core potential<sup>6</sup> (ECP) was used. The latest Grimme's semiempirical atom-pair-wise London dispersion correction (DFT-D3) was included in all calculations.<sup>7</sup> Harmonic frequency calculations verified the nature of ground states having all positive frequencies. From these optimized geometries all reported data were obtained by means of single-point (SP) calculations using the more polarized def2-TZVPP<sup>8</sup> basis set. Energies were corrected for the zero-point energy (ZPE) term at the optimization level and computed by means of the recently developed near linear scaling domain-based local pair natural orbital (DLPNO) method<sup>9</sup> to achieve coupled cluster theory with single-double and perturbative triple excitations (CCSD(T)).<sup>10</sup> Solvent effects (tetrahydrofurane) were taken into account via the COSMO solvation model.<sup>11</sup>

## Calculated structures

Cartesian coordinates (in Å) and ZPE (in hartrees) for minima were computed at COSMO<sub>CH<sub>2</sub>Cl<sub>2</sub></sub>/B3LYP-D3/def2-TZVPecp. In addition, electronic energies (in hartrees) are quoted at the COSMO<sub>CH<sub>2</sub>Cl<sub>2</sub></sub>/DLPNO-CCSD(T)/def2-TZVPPecp level.

TfOH: E = -960.969813140528 au  
ZPE = 0.03844403 au

|   |           |           |          |   |           |           |           |
|---|-----------|-----------|----------|---|-----------|-----------|-----------|
| S | 0.014467  | 0.016096  | 1.879741 | C | 0.004941  | 0.008734  | 0.015013  |
| O | 1.565478  | -0.018875 | 2.143485 | F | 0.636033  | 1.091974  | -0.435024 |
| H | 1.938716  | 0.877674  | 2.226570 | F | -1.254672 | 0.021558  | -0.407582 |
| O | -0.541768 | 1.265736  | 2.293715 | F | 0.615616  | -1.080071 | -0.439341 |
| O | -0.512198 | -1.239457 | 2.299711 |   |           |           |           |

TfO: E = -960.541814996882 au  
ZPE = 0.02712147 au

|   |           |           |          |   |           |           |           |
|---|-----------|-----------|----------|---|-----------|-----------|-----------|
| S | -0.000010 | -0.000852 | 0.912675 | C | 0.000000  | -0.000922 | -0.948186 |
| O | -0.002062 | 1.417213  | 1.235083 | F | -1.085364 | 0.627065  | -1.434051 |
| O | -1.225837 | -0.710559 | 1.242061 | F | 0.000209  | -1.252432 | -1.439551 |
| O | 1.227900  | -0.706934 | 1.242063 | F | 1.085162  | 0.627420  | -1.434047 |

1': E = -1284.67504872863 au  
ZPE = 0.22222333 au

|   |           |           |           |   |           |           |           |
|---|-----------|-----------|-----------|---|-----------|-----------|-----------|
| C | -0.027039 | -0.150153 | 0.069709  | C | 2.015267  | -3.093799 | 2.255083  |
| O | 0.058241  | -0.200888 | 1.539165  | O | 1.274742  | -3.791953 | 2.774706  |
| P | 1.576629  | -0.164353 | 0.850405  | C | 3.105034  | -2.840434 | -0.468281 |
| H | -0.335319 | 0.838741  | -0.266987 | O | 2.978398  | -3.398565 | -1.459223 |
| C | -0.771341 | -1.260787 | -0.647352 | C | -0.333853 | -1.217417 | -2.117607 |
| C | 2.094162  | 1.576806  | 0.937752  | H | -0.898236 | -1.948784 | -2.699042 |
| H | 2.580110  | 1.755949  | 1.897771  | H | -0.509465 | -0.231475 | -2.553976 |
| H | 1.243597  | 2.247401  | 0.825523  | H | 0.728338  | -1.448909 | -2.215937 |
| H | 2.820085  | 1.766786  | 0.144866  | C | -2.273528 | -0.945683 | -0.535965 |
| W | 3.375694  | -1.844854 | 1.320077  | H | -2.504645 | 0.029002  | -0.970897 |
| C | 4.881573  | -3.123446 | 1.791268  | H | -2.855957 | -1.702296 | -1.065269 |
| O | 5.730698  | -3.846077 | 2.065197  | H | -2.591648 | -0.939653 | 0.508476  |
| C | 4.723565  | -0.591525 | 0.394073  | C | -0.508178 | -2.644553 | -0.052950 |
| O | 5.478350  | 0.106020  | -0.111189 | H | 0.531575  | -2.942621 | -0.166633 |
| C | 3.699321  | -0.824148 | 3.083808  | H | -0.759179 | -2.671457 | 1.006853  |
| O | 3.902656  | -0.243024 | 4.048612  | H | -1.121927 | -3.384580 | -0.568961 |

**1' PO-cleavage:**

E = -1285.05439942296 au

ZPE = 0.23320065 au

|   |           |           |           |   |           |           |           |
|---|-----------|-----------|-----------|---|-----------|-----------|-----------|
| C | 0.699133  | -0.071371 | -0.423777 | O | 2.690043  | 1.073570  | -3.710280 |
| O | 1.903456  | -0.379760 | -1.088977 | C | -0.197488 | 3.397088  | -3.209534 |
| P | 0.536002  | 1.792243  | -0.348292 | O | -1.042146 | 3.410782  | -3.962046 |
| H | 0.728112  | -0.398283 | 0.620725  | C | -1.807945 | -0.306591 | -0.498683 |
| C | -0.490730 | -0.773349 | -1.125618 | H | -2.639918 | -0.853650 | -0.943023 |
| C | -0.100533 | 2.137598  | 1.304811  | H | -1.828902 | -0.483380 | 0.578476  |
| H | -0.401549 | 3.177931  | 1.399435  | H | -1.995727 | 0.757155  | -0.679958 |
| H | 0.707845  | 1.931743  | 2.014476  | C | -0.321485 | -2.282569 | -0.902499 |
| H | -0.932897 | 1.476997  | 1.547181  | H | -0.348501 | -2.526631 | 0.161697  |
| W | 1.405151  | 3.352154  | -1.837115 | H | -1.133570 | -2.819539 | -1.395570 |
| C | 2.345462  | 4.837398  | -3.030485 | H | 0.622861  | -2.636440 | -1.315314 |
| O | 2.849527  | 5.645639  | -3.638958 | C | -0.496182 | -0.471438 | -2.628358 |
| C | 0.524316  | 4.843199  | -0.709749 | H | -0.657135 | 0.589262  | -2.826816 |
| O | 0.027129  | 5.658592  | -0.090087 | H | 0.437844  | -0.772983 | -3.099346 |
| C | 3.144222  | 3.463337  | -0.670784 | H | -1.311025 | -1.018709 | -3.103715 |
| O | 4.085852  | 3.524986  | -0.043516 | H | 2.637836  | -0.358270 | -0.463360 |
| C | 2.239871  | 1.847874  | -3.011668 |   |           |           |           |

**10:**

E = -1285.10563305085 au

ZPE = 0.23446140 au

|   |           |          |           |   |           |           |           |
|---|-----------|----------|-----------|---|-----------|-----------|-----------|
| C | -0.664445 | 1.682205 | -0.374959 | O | 1.917643  | 1.925933  | -3.907768 |
| O | 1.586703  | 0.158728 | -0.645068 | C | -0.737805 | 4.170012  | -2.169539 |
| P | 0.995864  | 1.496198 | -0.005014 | O | -1.692109 | 4.540412  | -2.657636 |
| H | -1.175842 | 2.282152 | 0.370833  | C | -2.942648 | 1.486260  | -1.367950 |
| C | -1.559005 | 0.831346 | -1.262404 | H | -3.618345 | 0.824454  | -1.911252 |
| C | 1.375742  | 1.509933 | 1.753048  | H | -3.366595 | 1.666682  | -0.378505 |
| H | 2.447704  | 1.655349 | 1.885052  | H | -2.902515 | 2.432951  | -1.903262 |
| H | 1.073424  | 0.556990 | 2.186765  | C | -1.701871 | -0.515902 | -0.507423 |
| H | 0.836104  | 2.326616 | 2.230778  | H | -2.075335 | -0.363024 | 0.506086  |
| W | 1.098995  | 3.620907 | -1.302124 | H | -2.416778 | -1.143474 | -1.042667 |
| C | 1.872537  | 5.313273 | -2.219355 | H | -0.750410 | -1.044849 | -0.456607 |
| O | 2.323846  | 6.223946 | -2.723547 | C | -1.003074 | 0.566452  | -2.664043 |
| C | 0.554587  | 4.671588 | 0.403369  | H | -0.947661 | 1.487709  | -3.243551 |
| O | 0.255908  | 5.230331 | 1.349371  | H | -0.017296 | 0.106314  | -2.634692 |
| C | 3.045112  | 3.500419 | -0.569330 | H | -1.674420 | -0.113974 | -3.188876 |
| O | 4.104451  | 3.463995 | -0.160050 | H | 2.502767  | 0.200899  | -0.955778 |
| C | 1.610092  | 2.518808 | -2.985991 |   |           |           |           |

**11·H<sup>+</sup>:**

E = -1285.06792557283 au

ZPE = 0.23156120 au

|   |           |           |           |   |          |           |           |
|---|-----------|-----------|-----------|---|----------|-----------|-----------|
| C | -0.531631 | -0.681563 | 0.212249  | H | 2.176331 | 1.185876  | 2.187626  |
| O | 2.215101  | -0.715832 | -0.080056 | H | 1.343257 | -0.346840 | 2.507351  |
| P | 1.122387  | 0.450618  | 0.209860  | H | 0.411287 | 1.175014  | 2.387073  |
| H | -1.224870 | -0.018075 | 0.730314  | W | 1.343119 | 2.516870  | -1.168627 |
| C | -0.882712 | -0.816488 | -1.167805 | C | 1.670884 | 4.206633  | -2.275304 |
| C | 1.264880  | 0.614732  | 2.006397  | O | 1.863905 | 5.145381  | -2.898217 |

|   |           |           |           |   |           |           |           |
|---|-----------|-----------|-----------|---|-----------|-----------|-----------|
| C | 1.763506  | 3.592607  | 0.553739  | H | -2.174566 | 0.893478  | -1.135417 |
| O | 2.003680  | 4.192378  | 1.494307  | C | -0.259113 | -1.980938 | 0.974298  |
| C | 3.359194  | 2.092120  | -1.347313 | H | -0.147426 | -1.774445 | 2.034765  |
| O | 4.476715  | 1.876339  | -1.444124 | H | -1.114925 | -2.645899 | 0.853333  |
| C | 0.961823  | 1.466082  | -2.894450 | H | 0.631928  | -2.493195 | 0.620462  |
| O | 0.755584  | 0.880302  | -3.857416 | C | -0.285579 | -1.873514 | -1.986896 |
| C | -0.635334 | 3.077115  | -0.962243 | H | -0.399547 | -1.699831 | -3.052972 |
| O | -1.715877 | 3.431185  | -0.842031 | H | 0.754975  | -2.060088 | -1.715135 |
| C | -1.889540 | 0.056478  | -1.763384 | H | -0.815746 | -2.804195 | -1.731591 |
| H | -1.644220 | 0.357024  | -2.781288 | H | 2.706137  | -0.589616 | -0.902951 |
| H | -2.776455 | -0.594250 | -1.863615 |   |           |           |           |

11·HOTf:

E = -2245.64276468593 au

ZPE = 0.25959488 au

|   |           |           |           |   |           |           |           |
|---|-----------|-----------|-----------|---|-----------|-----------|-----------|
| C | 0.039608  | -0.026982 | 0.071853  | H | -0.547011 | 0.541468  | -3.149813 |
| O | 2.839153  | 0.228947  | -0.046467 | H | -1.801101 | -0.383428 | -2.373511 |
| P | 1.679816  | 1.308681  | -0.008082 | H | -1.424563 | 1.217629  | -1.728711 |
| H | -0.732190 | 0.671723  | 0.389213  | C | 0.387382  | -1.099817 | 1.090155  |
| C | -0.065367 | -0.384568 | -1.284580 | H | 0.379174  | -0.693569 | 2.097420  |
| C | 1.460340  | 1.843222  | 1.713238  | H | -0.369738 | -1.885062 | 1.043589  |
| H | 2.285710  | 2.522673  | 1.923878  | H | 1.357913  | -1.553629 | 0.902836  |
| H | 1.488436  | 1.023931  | 2.426065  | C | 0.719423  | -1.504543 | -1.830914 |
| H | 0.516703  | 2.383239  | 1.789332  | H | 0.684463  | -1.549428 | -2.915618 |
| W | 1.936389  | 3.112995  | -1.714893 | H | 1.753769  | -1.452145 | -1.478163 |
| C | 2.351198  | 4.624697  | -3.015772 | H | 0.318525  | -2.439855 | -1.420204 |
| O | 2.589156  | 5.477152  | -3.744204 | H | 3.372995  | 0.085566  | 0.810642  |
| C | 2.104576  | 4.461604  | -0.154582 | O | 4.213540  | 0.004154  | 2.079612  |
| O | 2.213308  | 5.209430  | 0.702071  | S | 5.022937  | 1.201755  | 2.390547  |
| C | 3.977395  | 2.728646  | -1.586853 | O | 4.629970  | 2.374930  | 1.636141  |
| O | 5.097439  | 2.526587  | -1.552582 | O | 5.262632  | 1.382944  | 3.803188  |
| C | 1.865727  | 1.755679  | -3.258475 | C | 6.688392  | 0.757297  | 1.696683  |
| O | 1.858313  | 0.992079  | -4.113340 | F | 7.203821  | -0.301079 | 2.337074  |
| C | -0.066550 | 3.558966  | -1.861270 | F | 7.536077  | 1.785362  | 1.832976  |
| O | -1.173715 | 3.843025  | -1.948493 | F | 6.597278  | 0.456195  | 0.394742  |
| C | -0.986834 | 0.331094  | -2.175885 |   |           |           |           |

12·H<sup>+</sup>:

E = -1285.07218638625 au

ZPE = 0.23440763 au

|   |           |           |           |   |           |           |           |
|---|-----------|-----------|-----------|---|-----------|-----------|-----------|
| C | -0.239950 | -0.657320 | 0.185526  | C | 1.581986  | 3.524342  | 0.193680  |
| O | 1.987122  | -1.257770 | 0.041965  | O | 1.462244  | 4.277407  | 1.041797  |
| P | 1.269076  | 0.409389  | 0.268229  | C | 3.813259  | 1.970406  | -0.873179 |
| H | -0.760482 | -0.406718 | -0.738071 | O | 4.919858  | 1.873264  | -0.613609 |
| C | 0.571119  | -1.961430 | -0.036812 | C | 2.010008  | 0.768966  | -2.867946 |
| C | 1.696976  | 0.605364  | 2.010006  | O | 2.118314  | 0.001393  | -3.707451 |
| H | 2.733885  | 0.933935  | 2.077883  | C | -0.213826 | 2.287293  | -1.797703 |
| H | 1.559032  | -0.308583 | 2.583164  | O | -1.325196 | 2.346877  | -2.050360 |
| H | 1.059076  | 1.391191  | 2.421061  | C | 0.426655  | -2.548573 | -1.414060 |
| W | 1.797721  | 2.137932  | -1.332974 | H | 1.159043  | -3.338287 | -1.585281 |
| C | 2.202076  | 3.691933  | -2.638372 | H | -0.569791 | -2.986930 | -1.490904 |
| O | 2.422300  | 4.554305  | -3.349458 | H | 0.515527  | -1.788873 | -2.190741 |

|   |           |           |          |   |           |           |           |
|---|-----------|-----------|----------|---|-----------|-----------|-----------|
| C | -1.222376 | -0.596343 | 1.343424 | H | 1.282921  | -3.765683 | 0.862814  |
| H | -1.671750 | 0.395894  | 1.394733 | H | 0.788835  | -2.532217 | 2.037209  |
| H | -2.027996 | -1.314296 | 1.186354 | H | -0.432026 | -3.424414 | 1.123373  |
| H | -0.757290 | -0.809254 | 2.303708 | H | 2.570980  | -1.415585 | -0.720185 |
| C | 0.561408  | -2.976364 | 1.070631 |   |           |           |           |

12·HOTf:

E = -2245.66480342571 au

ZPE = 0.26199327 au

|   |           |           |           |   |           |           |           |
|---|-----------|-----------|-----------|---|-----------|-----------|-----------|
| C | -0.236858 | -0.631422 | 0.129459  | H | 1.408447  | -3.445449 | -1.178502 |
| O | 1.943924  | -1.225276 | 0.332829  | H | -0.313333 | -3.092404 | -1.386404 |
| P | 1.297393  | 0.318867  | 0.532026  | H | 0.899181  | -1.954910 | -1.996327 |
| H | -0.517655 | -0.400929 | -0.897837 | C | -1.460884 | -0.534756 | 1.018941  |
| C | 0.628362  | -1.930877 | 0.141313  | H | -1.901658 | 0.460445  | 0.943604  |
| C | 1.296369  | 0.608168  | 2.322250  | H | -2.217310 | -1.253982 | 0.698911  |
| H | 2.308809  | 0.861667  | 2.632159  | H | -1.235350 | -0.725870 | 2.066742  |
| H | 0.949182  | -0.254905 | 2.886200  | C | 0.411201  | -2.871921 | 1.305555  |
| H | 0.644160  | 1.460513  | 2.524382  | H | 1.170696  | -3.654899 | 1.293282  |
| W | 2.210596  | 2.111086  | -0.924862 | H | 0.463648  | -2.356840 | 2.262656  |
| C | 2.968959  | 3.550533  | -2.159580 | H | -0.566947 | -3.347065 | 1.221306  |
| O | 3.396617  | 4.354304  | -2.857516 | H | 3.213759  | -1.899523 | 0.569973  |
| C | 1.336534  | 3.535308  | 0.283174  | S | 5.067083  | -1.638909 | 1.655287  |
| O | 0.844432  | 4.314807  | 0.962807  | C | 6.282486  | -1.032986 | 0.380832  |
| C | 3.918566  | 2.235761  | 0.238431  | O | 4.092276  | -2.429417 | 0.759658  |
| O | 4.859799  | 2.352057  | 0.875852  | O | 4.430981  | -0.473093 | 2.195481  |
| C | 3.029474  | 0.608104  | -2.082833 | O | 5.793848  | -2.538766 | 2.494055  |
| O | 3.452856  | -0.249280 | -2.710221 | F | 6.888440  | -2.061228 | -0.209633 |
| C | 0.493500  | 2.039889  | -2.061620 | F | 7.194778  | -0.270295 | 0.979219  |
| O | -0.466426 | 1.997163  | -2.685283 | F | 5.646987  | -0.313193 | -0.545428 |
| C | 0.663816  | -2.647885 | -1.188574 |   |           |           |           |

8':

E = -2049.49064415372 au

ZPE = 0.12343033 au

|   |          |           |           |   |           |           |           |
|---|----------|-----------|-----------|---|-----------|-----------|-----------|
| O | 1.971812 | -1.236822 | -0.238996 | C | 2.295146  | 0.633768  | -2.820886 |
| P | 1.556098 | 0.223613  | 0.261764  | O | 2.785160  | -0.095652 | -3.550293 |
| C | 2.478218 | 0.504392  | 1.786218  | C | -0.451735 | 1.184957  | -2.017993 |
| H | 3.521285 | 0.679402  | 1.519458  | O | -1.470783 | 0.753178  | -2.301212 |
| H | 2.414125 | -0.347321 | 2.463603  | H | 2.047813  | -1.916956 | 0.451367  |
| H | 2.084657 | 1.395982  | 2.275294  | O | -0.022746 | -0.028326 | 0.946248  |
| W | 1.401158 | 1.937204  | -1.481532 | S | -0.550295 | -1.197861 | 1.841137  |
| C | 1.279666 | 3.380680  | -2.933859 | C | -1.828613 | -1.883095 | 0.665891  |
| O | 1.212439 | 4.185312  | -3.744901 | O | -1.255998 | -0.666839 | 2.960036  |
| C | 0.510307 | 3.192530  | -0.106673 | O | 0.460849  | -2.202020 | 2.011964  |
| O | 0.022874 | 3.877776  | 0.668757  | F | -2.736287 | -0.952377 | 0.397344  |
| C | 3.251896 | 2.646485  | -0.906172 | F | -1.241387 | -2.271137 | -0.461998 |
| O | 4.275093 | 3.032107  | -0.569441 | F | -2.413789 | -2.924118 | 1.249341  |

Isobutylene:

E = -196.169736053716 au

ZPE = 0.13535372 au

|   |           |           |           |   |           |           |           |
|---|-----------|-----------|-----------|---|-----------|-----------|-----------|
| C | -0.005136 | -0.001371 | 0.027833  | H | -0.064302 | 3.068648  | 0.918584  |
| H | 1.082576  | 0.000908  | 0.038251  | H | 1.256023  | 2.271171  | 0.047325  |
| C | -0.613932 | 1.187271  | 0.026992  | H | -0.050931 | 3.077872  | -0.836128 |
| C | -2.103938 | 1.387584  | 0.013499  | C | -0.628605 | -1.363398 | 0.016002  |
| H | -2.402454 | 1.967249  | -0.865971 | H | -0.299581 | -1.932570 | -0.859178 |
| H | -2.663760 | 0.454803  | 0.008040  | H | -0.319433 | -1.939034 | 0.894219  |
| H | -2.418861 | 1.966597  | 0.887613  | H | -1.717033 | -1.334221 | 0.003779  |
| C | 0.182887  | 2.463729  | 0.039838  |   |           |           |           |

## REFERENCES

- 
- <sup>1</sup> SHELXT – Integrated space-group and crystal-structure determination, *Acta Cryst.*, **2015**, *A71*, 3-8.
- <sup>2</sup> Crystal structure refinement with SHELXL, *Acta Cryst.*, **2015**, *C71*, 3-8.
- <sup>3</sup> ORCA - An *ab initio*, DFT and semiempirical SCF-MO package. Written by F. Neese, Max Planck Institute for Bioinorganic Chemistry, D-45470 Mülheim/Ruhr, 2012. Version 3.0.3. Web page: <http://www.cec.mpg.de/forum/portal.php>. F. Neese, *WIREs Comput Mol Sci* **2012**, *2*, 73–78.
- <sup>4</sup> a) A. D. Becke, *J. Chem. Phys.*, **1993**, *98*, 5648-5652. b) C. T. Lee, W. T. Yang, R. G. Parr, *Phys. Rev. B*, **1988**, *37*, 785-789.
- <sup>5</sup> F. Weigend, R. Ahlrichs, *Phys. Chem. Chem. Phys.* **2005**, *7*, 3297-3305.
- <sup>6</sup> D. Andrae, U. Haeussermann, M. Dolg, H. Stoll, H. Preuss, *Theor. Chim. Acta* **1990**, *77*, 123-141. ECP basis sets for W [SD(60,MWB)] have been obtained from Turbomole basis set library at <ftp://ftp.chemie.uni-karlsruhe.de/pub/basen/>.
- <sup>7</sup> S. Grimme, J. Antony, S. Ehrlich, H. Krieg, *J. Chem. Phys.* **2010**, *132*, 154104.
- <sup>8</sup> A. Bergner, M. Dolg, W. Kuchle, H. Stoll, H. Preuss, *Mol. Phys.* **1993**, *80*, 1431–1441. Obtained from the EMSL Basis Set Library at <https://bse.pnl.gov/bse/portal>. D. Feller, *J. Comp. Chem.*, **1996**, *17*, 1571-1586.
- <sup>9</sup> C. Riplinger, B. Sandhoefer, A. Hansen, F. Neese, *J. Chem. Phys.* **2013**, *139*, 134101-134113.
- <sup>10</sup> J. A. Pople, M. Head-Gordon, K. Raghavachari, *J. Chem. Phys.* **1987**, *87*, 5968–5975.
- <sup>11</sup> a) A. Klamt, G. Schüürmann, *J. Chem. Soc. Perkin Trans. 2*, **1993**, *220*, 799-805; b) A. Klamt, *J. Phys. Chem.* **1995**, *99*, 2224-2235.
